# 1 Observations of the Effect of Scopolamine on Hippocampal CA1 2 Place Cell and Network Properties in Freely Moving Mice Using 3 Miniscope Imaging

4 Dechuan Sun<sup>1,2\*</sup>, Ranjith Rajasekharan Unnithan<sup>2</sup>, Chris French<sup>1,\*</sup>

5 1. Department of Medicine, The University of Melbourne

6 2. Department of Electrical and Electronic Engineering, The University of Melbourne

7 \*. Author to whom correspondence should be addressed

8

## 9 Abstract

10 The hippocampus and associated cholinergic inputs regulate spatial memory in rodents.  
11 Muscarinic blockade with scopolamine results in cognition deficits usually attributed to  
12 impaired memory encoding, but effects on memory retrieval are controversial. Here, we  
13 simultaneously recorded hundreds of neurons in mouse hippocampal CA1 using calcium  
14 imaging with a miniaturized fluorescent microscope to study place cell and ensemble neuronal  
15 properties in a linear track environment. We found decoding accuracy and ensemble stability  
16 were significantly reduced after the administration of scopolamine. Several other parameters  
17 including the  $Ca^{2+}$  event rate, number of total cells and place cells observed, spatial  
18 information content were affected including a small increase in running speed. This study  
19 enhances the understanding of cholinergic blockade on spatial memory impairment.

20

## 21 1.Introduction

22 In rodents, memory formation and retrieval critically rely on the hippocampus (HIP) ([Buzsáki](#)  
23 [et al., 1990](#); [Izquierdo et al., 1997](#); [Wiltgen et al., 2010](#); [Carr et al., 2011](#)). Place cells are  
24 hippocampal pyramidal neurons that activate in response to position and have been shown to  
25 have an important functional role in encoding and decoding spatial position ([Dragoi et al., 2006](#);  
26 [Pfeiffer et al., 2013](#); [Wikenheiser et al., 2015](#)). Cholinergic receptors are abundantly expressed  
27 in the brain, and the modulation of spatial memory in rodent hippocampus is dependent on  
28 cholinergic inputs, especially muscarinic acetylcholine receptors (mAChRs) ([Riekkinen et al.,](#)

29 1997; Brazhnik et al., 2003; Svoboda et al., 2017). Scopolamine blockade of mAChRs, has  
30 been found to greatly impair memory encoding, but its effect on memory retrieval is less clear  
31 (Svoboda et al., 2017). Some studies show no or very little influence of scopolamine on  
32 memory decoding (Riekkinen et al., 1997; Deiana et al., 2011; More et al., 2016), while Huang  
33 et al. (2011) report effects on both encoding and decoding. Additionally, the mechanism of the  
34 effect of scopolamine on memory retrieval is poorly understood. Intracranial electrodes arrays  
35 are commonly used to record local field potentials and single unit activity and allow detailed  
36 observations of cognition-related processes in terms of neural firing patterns, but the number  
37 of cells and spatial position in the brain is generally limited. We used *in vivo* calcium imaging  
38 to record the activity of neural ensembles in the hippocampal CA1 region of freely running  
39 mice with the miniscopes (Ghosh et al., 2011; Aharoni et al., 2019), which allowed the  
40 simultaneous recording of  $Ca^{2+}$  activity of a large population of neurons. We demonstrated  
41 that the blockade of mAChRs severely impaired the decoding accuracy with an animal running  
42 through a linear track, attributable to impaired stability of the hippocampal neural ensemble.  
43 Several parameters including  $Ca^{2+}$  rate, spatial information, total neuron number as well as  
44 the animal's running speed were also affected.

45

## 46 **2. Materials and Methods**

47 All surgical and experimental procedures were approved by the Florey Animal Ethics  
48 Committee (No. 18-008UM) and were conducted in strict accordance with Australian Animal  
49 Welfare Committee guidelines.

50

### 51 **2.1 Subjects**

52 Five naive adult male C57BL/6 mice aged 12 weeks were obtained from WEHI (Melbourne,  
53 VIC) and housed in the Biological Research Facility of the Department of Medicine, Royal  
54 Melbourne Hospital, University of Melbourne. All animals weighed 24-25g at the time of  
55 surgery and then were housed individually. The facility was maintained on a 12-12h light-dark  
56 schedule (lights on: 7:30 am to 19:30 pm) with water and standard mice chow *ad libitum*. All  
57 procedures were conducted in the daytime.

58

## 59 **2.2 Drugs Administration**

60 Scopolamine hydrobromide (Sigma-Aldrich, USA) was dissolved in 0.9% saline and injected  
61 intraperitoneally at a volume of 1 mg/kg (Newman et al., 2017).

62

## 63 **2.3 Stereotaxic Surgery**

64 The surgical procedures had two components – virus infusion and grin lens implantation.

### 65 **Virus infusion**

66 pAAV.Syn.GCaMP6f.WPRE.SV40 virus ( titer:  $2.2 \times 10^{13}$  GC/mL, obtained from AddGene,  
67 USA) was injected into dorsal hippocampus (AP -2.1, ML +2.1, DV -1.7 relative to bregma)  
68 through a custom made injecting system over a duration of 15 minutes. The virus was firstly  
69 loaded into a 1.5 mm OD, 0.9 mm ID capillary, which was fabricated on a Sutter P-1000  
70 electrode puller to make a sharp tip (diameter: 20-50  $\mu$ m); sealed with silicon oil (Sigma-  
71 Aldrich, USA) at the open end; and a brass round rod (diameter: 0.8mm; Albion Alloys, UK),  
72 which was fixed on a precise 3D positioner finally fitted into the capillary to control the volume  
73 of the virus injected. See Figure 10 for diagram of the injecting system. The virus injector was  
74 left in place for additional 10 minutes to allow for viral diffusion. After stitching the wound,  
75 the animal was then left for one week to recover and to allow fluorophore expression.

### 76 **GRIN lens implantation**

77 Two 1mm screws were implanted (AP +1.8, ML -2.5; AP -2.8, ML -0.8) to serve as anchors.  
78 A small window of skull was removed by using a 2mm drill bur, centred at (AP -2.1, ML +1.6)  
79 and the exposed dura was cleaned with fine tweezers. A 27-gauge blunt needle was used to  
80 aspirate the above cortex to expose the vertical striations of the hippocampal fimbria, with  
81 artificial cerebrospinal fluid dropped constantly during the procedure to provide a clear  
82 operating field. Using the most posterior point of the edge of the drilled hole (next to lambda  
83 side) as a reference, the grin lens (0.23pitch, #64-519, Edmund Optics) was implanted 1.35mm  
84 deep, touching the surface of exposed tissue. Superglue was applied surrounding the lens to  
85 prevent movement and dental cement was built over the glue for support, the lens was then  
86 covered with fast setting silicone adhesive (Dragon Skin® Series, USA). After the surgery, the  
87 animal was injected with carprofen (5mg/kg) and dexamethasone (0.6mg/kg, Sigma-Aldrich,  
88 USA) intraperitoneally everyday, and provided with enrofloxacin water (1:150 dilution,

89 Baytril®, USA) for one week. Four weeks later, a small metal baseplate was mounted on  
90 animal's head to support the miniscope, and the miniscope (focal length of the inside  
91 achromatic lens: 7.5mm, #45-407, Edmund Optics) was locked in the position at the optimal  
92 focal distance.

93

## 94 **2.4 Animal Training**

95 Before training, the animals were handled approximately 10 minutes twice a day in the daytime  
96 and weighed after each handling session for 5 days, to familiarise the animal and the averaged  
97 weight could be assumed as a reference of free-feeding weight. A food restriction regimen was  
98 implemented to keep the animal at 85% of its original average weight ([Kermani et al., 2018](#)).  
99 The animal was then trained to run back and forth on a 1.6m linear track with clues painted on  
100 the walls for food reward while wearing the miniscope, and a small food pellet was given to  
101 the animal once it could rapidly run through the track without wandering. During each training  
102 session, the animal performed up to 30 trials within 40 minutes.

103

## 104 **2.5 Experimental Procedure**

105 All the recordings were performed during daytime. The animal was brought into a silent  
106 recording room 30 minutes before the start of recording to become familiar with the  
107 surrounding environment. After mounting the miniscope, the animal was put back to its cage  
108 for 5 minutes and then moved to the linear track to freely explore the space for 30 minutes.  
109 Then the linear track was cleaned with 80% ethanol to eliminate scent clues, and 12 running  
110 trials were recorded as a baseline control. Imaging frames were recorded with miniscope  
111 acquisition software ([UCLA Miniscope, 2017](#)). The excitation LED intensity was set to proper  
112 value with a sampling rate of 30 FPS. The animal was then injected with saline or scopolamine,  
113 replaced in its cage for 20 minutes and then performed another 12 running trials. A camera  
114 fixed overhead was synchronized with miniscope to record the animal's position and the  
115 miniscope cable was suspended over the linear track through a custom-made commutator.

116

## 117 **2.6 Processing of Calcium Imaging Data**

### 118 **Image Pre-processing and Calcium Activity Deconvolution**

119 A non-rigid motion correction algorithm was applied first to implement image registration  
120 (Pnevmatikakis et al., 2017). Constrained Non-negative Matrix Factorization for  
121 microendoscopic data (CNMF-E) was utilized to identify and extract each neuron’s spatial  
122 boundary and calcium activity (Zhou et al., 2018). A fast deconvolution algorithm was then  
123 utilized to deconvolve the calcium activity to estimate neural spike-activity (Friedrich et al.,  
124 2017). This algorithm sometimes produces low-amplitude “partial spikes”, which were  
125 removed by setting a small threshold. This threshold is chosen by observing the distribution of  
126 the deconvolved signals across cells (Pennington et al., 2019). We refer to this deconvoluted  
127 signal as “temporal spike activity”.

128

## 129 **Place field map**

130 The position of the animal’s head and running speed were detected by using custom Matlab  
131 script. We separately analysed the data of both left-to-right (LR) and right-to-left (RL) running  
132 directions. To analyse the neural spatial spike activity, the linear track was divided into several  
133 2cm bins (the bins on each end were discarded), and a speed threshold of 8cm/s was set, then  
134 the bins occupancy was calculated as well as the calcium event rate ( the number of spikes in  
135 each bin) of each neuron in all bins, and a Gaussian smoothing kernel ( $\sigma = 1.5$  bins, size = 5  
136 bins) was applied. The place field map for each neuron was measured by dividing each neuron’s  
137 smoothed spatial spike activity by the smoothed bins occupancy, with the maximum value  
138 defined as the place field’s position (Rubin et al., 2015).

139

## 140 **Spatial information content and place cells**

141 The neuron’s spatial information content was defined as (Markus et al., 1994):

$$142 \quad I = \sum_{i=1}^K P_i \frac{\lambda_i}{\bar{\lambda}} \log_2 \frac{\lambda_i}{\bar{\lambda}}$$

143 Where K is the number of bins;  $P_i$  is the occupancy ratio of the bin i;  $\lambda_i$  is the neuron’s calcium  
144 event rate in bin i;  $\bar{\lambda}$  is the mean calcium event ( $\sum_{i=1}^K P_i \lambda_i$ ).

145 We used the unsmoothed bins occupancy and the calcium event rate to calculate the spatial  
146 information content for each neuron and then shuffled the animal's position as well as neuron's  
147 temporal spike activity for 800 times. A place cell was defined as the neuron whose spatial  
148 information content was above chance ( $p < 0.05$ ) with respect to the shuffling results.

149

### 150 **Odd & Even trials Population Vector Overlap**

151 To look at the similarity degree of neuron's firing pattern within one session, we calculated the  
152 population vector overlap (PVO) between odd and even trials (Ravassard et al., 2013).

$$153 \quad PVO(x, y) = \frac{\sum_{n=1}^N \lambda_n(x) \lambda_n(y)}{\sqrt{\sum_{n=1}^N \lambda_n(x) \lambda_n(x)} \cdot \sqrt{\sum_{n=1}^N \lambda_n(y) \lambda_n(y)}}$$

154 Where N is the number of total neurons; x and y are different bins;  $\lambda$  is the place field map.

155

### 156 **Decoding**

157 A leave-one-out naïve Bayesian decoder was utilized to estimate the position of the animal  
158 based on neuronal temporal spike activity (Zhang et al., 1998).

$$159 \quad P(x|n) = P(x) \left( \prod_{i=1}^N f_i(x)^{n_i} \right) \cdot \exp \left( -\tau \sum_{i=1}^N f_i(x) \right)$$

160 Where n is the current input temporal spike activity; x is the bin number; P(x) is the occupancy  
161 ratio of bin x;  $f_i(x)$  is the average calcium event rate of neuron i at bin x;  $\tau$  is the time window  
162 length of the input temporal spike activity.

163

### 164 **Statistics**

165 A two-tailed t-test was performed using SPSS (IBM, Armonk, NY, USA) for all the measures.  
166 The level of significance was set at  $p < 0.05$ . All results were showed as means  $\pm$  standard error  
167 of mean (S.E.M) of the percentage variation from the baseline

168

## 169 **3. Results**

170 We want to explore how does the antagonists of muscarinic cholinergic transmission affect the  
171 activity of the neural ensemble in hippocampal CA1 by observing the fluorescent calcium  
172 signal of each neuron within a large field of view. We injected an AAV encoded calcium  
173 indicator into hippocampal CA1 of mouse and collected the fluorescent signal as the mouse  
174 run back and forth in a linear track before and after the administration of saline and scopolamine.  
175 Figure 9 showed an example frame of the raw fluorescent data. After deconvolving the neural  
176 spike activity, we compared the firing patterns of the place cell ensembles between control and  
177 drug groups, including total cell numbers, place cell numbers, place cells' total  $Ca^{2+}$  event rate,  
178 place field map, spatial information, odd and even trials population vector overlap, decoding  
179 error, as well as the animal's running speed. All results were showed as a percentage change  
180 after injecting saline or scopolamine with respect to the baseline self-control.

181

### 182 **Scopolamine increased running speed**

183 The animal's average running speed was calculated using all the data on both running  
184 directions except the bins on each end of the linear track. The scopolamine treated mice had a  
185 slightly higher running velocity (increased to 116.48% with respect to baseline, SEM: 7.62%)  
186 compared with saline treated ones (decreased to 95.02% with respect to baseline, SEM: 5.23%)  
187 by applying a 2-tailed t-test ( $p < 0.05$ ; Fig1).

188

### 189 **Scopolamine reduced the total cell number of cells detected but increased the $Ca^{2+}$ event 190 rate**

191 We first studied the effects of blocking mAChR on total neuron number as well as the average  
192  $Ca^{2+}$  event rate. Saline injection had no significant effect on neuron number. Scopolamine  
193 significantly (2-tailed t-test,  $p < 0.01$ ) reduced the total number of detected neurons to 84.7%,  
194 (S.E.M: 9.10%) of the baseline level (Fig 2A). Before injecting scopolamine, there were about  
195 640 neurons (S.E.M:46.0) in each animal and the number decreased to 541 (S.E.M:46.0) after  
196 injection. Interestingly, the remaining neurons with calcium signal became more active after  
197 the administration of scopolamine, and the average  $Ca^{2+}$  event rate was greatly enhanced  
198 (199.5%, S.E.M: 23.5%) compared with saline (96.2%, S.E.M: 2.66%; 2-tailed t-test,  $p < 0.01$ ;  
199 Fig 2B). Slow calcium firing patterns (1.05 HZ, S.E.M:0.16) occurred at baseline but the  $Ca^{2+}$   
200 event rate almost doubled after scopolamine administration (1.96 HZ, S.E.M:0.10).

201

202 **Reduction of place cell number and spatial information content occurred with**  
203 **scopolamine administration**

204 Head direction plays an important role in rodent spatial navigation ([Muir et al., 2002](#)), so we  
205 separately analysed the data on both left and right running trials. Spatial information content  
206 (whether the neuron had one or several specific firing locations or not) was used as the criterion  
207 for location specificity. A small increase in place cells was associated with saline injections in  
208 both RL (110.25%, S.E.M: 4.21%,  $P>0.05$ ) and LR running sessions (103.49%, S.E.M: 3.90%,  
209  $P>0.05$ ; Fig 3A), and probably because the location sensitivity is reinforced with more running  
210 trials. However, both ratios declined after scopolamine injection (80.32%, S.E.M: 2.04%,  
211  $p<0.001$  and 84.98%, S.E.M: 3.91%,  $p<0.01$  separately; Fig 3A). During the baseline  
212 observation, a mean of 356 place cells (S.E.M: 38) was observed in each animal on the RL  
213 running session and 328 place cells (S.E.M: 30) on the LR running session. After the  
214 administration of scopolamine, the numbers reduced to 283 (RL, S.E.M:26) and 279 (LR,  
215 S.E.M:31) separately. Spatial information content of the place cells was then quantified.  
216 Scopolamine greatly impaired location sensitivity, with the spatial information content  
217 decreasing by more than half (RL, 48.68%, S.E.M: 6.79%,  $p<0.001$  and LR, 46.72%, S.E.M:  
218 7.28%,  $p<0.001$ ; Fig 3B). During baseline recording, average information content was 1.81  
219 bits (S.E.M: 0.17) and 1.71 bits (S.E.M: 0.17) on RL and LR running directions, which  
220 decreased to 0.88 bits (S.E.M: 0.10) and 0.79 bits (S.E.M: 0.09) after scopolamine  
221 administration. Figure 4 showed the average spatial information content before and after drug  
222 administration.

223

224 **Neuronal Ensemble Stability is Impaired by Scopolamine**

225 To further explore the effects of blocking mAChR on neural ensemble activity, we first  
226 calculated the place field map (see Method; Fig.5) when the animal was running through the  
227 linear track. Before injecting scopolamine, most of place cells had relatively consistent firing  
228 locations in both running directions. Interestingly, although most of the place cells still showed  
229 a certain level of place sensitivity after scopolamine, it was greatly impaired compared with  
230 the baseline, and the neurons' "spontaneous" firing became stronger. In order to quantify the  
231 level of ensemble stability, we analysed the population vector overlap (PVO) between the odd  
232 trials and even trials data within every session, which revealed the overlap of ensemble activity



233 in these two different conditions. In Figure 6, there is a very clear diagonalization feature during  
234 the baseline in both running directions, showing a specific and consistent firing pattern in both  
235 even and odd trials. However, due to mAChR inhibition, this diagonalization feature  
236 disappeared, and the stability of the neural system degenerated. We then plotted the mean PVO  
237 ratio with respect to the distance offset (Fig.7). After injecting saline, the PVO ratio changed  
238 little compared with the baseline and it was quite stable with very small standard error mean,  
239 and once the scopolamine was injected, the PVO ratio increased significantly in both RL  
240 ( $p<0.01$ ) and LR ( $p<0.01$ ) running directions. Besides, the PVO ratio tended to increase with  
241 respect to the offset distance, which may be because of the neural decoding system  
242 degeneration.

243

#### 244 **Scopolamine decreased decoding accuracy**

245 The stability of the neural ensemble greatly influenced decoding. We analysed the animal's  
246 neural decoding accuracy by using a Bayesian decoder to predict the animal's position (see  
247 Method). In this case, the entire neuron population was considered in the decoding instead of  
248 just one neuron and we only used the place cells to train the decoder. The error ratio decreased  
249 (25.60%, S.E.M: 4.27%) after saline injection with respect to the baseline and significantly  
250 enhanced after dealing with scopolamine (150.68%, S.E.M: 16.68%;  $p<0.01$ ). Before mAChR  
251 was blocked, the average estimation error was 1.3 cm/frame (S.E.M: 0.08), while the error  
252 enhanced to 3.16 cm/frame (S.E.M: 0.17) after blocking, which increased almost 2.5 times.

253

## 254 **4. Discussion**

255 In this study we have observed the effects of scopolamine on calcium signalling in CA1  
256 neurons in mouse hippocampus during free movement in a linear track. Scopolamine had quite  
257 striking effects on cellular and ensemble behaviour, disrupting place cell specificity, which we  
258 interpret as a disruptive effect on decoding of neural correlates of spatial memory.

259 Scopolamine has been used frequently previously to study behavioural, neurochemical and  
260 electrophysiological effects of disruption of the muscarinic cholinergic system known to be  
261 critical for hippocampal function. It has strong amnesic effects and has been used extensively  
262 as a model for the memory dysfunction seen in neurodegenerative conditions such as  
263 Alzheimer's disease associated with cholinergic transmission impairment. Previous studies

264 have emphasized impairment of encoding of memory, but in this study we have examined  
265 effects on place cells and related ensembles after encoding so it would be expected that the  
266 changes in place cell properties we think are best ascribed to impairment of the decoding  
267 process, an effect that has been found previously (Huang et al, 2010).

268 We used times of onset and dosing levels similar to previous studies (Klinkenberg and  
269 Blokland, 2010; Falsafi et al., 2012). We found that the animal's average running speed  
270 increased slightly after injecting scopolamine, differing from previous findings (Douchamps et  
271 al., 2013; Newman et al., 2017), and this may be due to a higher dose of scopolamine used or  
272 the animal studied (mouse rather than rats). Increase in locomotion speed was observed in  
273 Bushnell (1987) with dose dependent enhancement in mobility with ~25% increase with  
274 1mg/kg, but no error estimates are provided. (Bushnell, 1987; As hippocampal CA1 neuronal  
275 firing is affected by running speed in place fields (Geisler et al., 2007), we adjusted for this  
276 variable by calculating the animal's running speed distributions of the baseline and after  
277 injection, and only analysing frames in which the animal was moving above a designated  
278 velocity, to minimise possible effects.

279 CA1 pyramidal cells display clear location-specific firing (O'Keefe and Dostrovsky, 1971; see  
280 Moser et al., 2008 for review), while interneurons appear to have relatively weaker spatial  
281 modulation (Hangya et al., 2010). In the current study we were unable to distinguish between  
282 these two cell types, but this is unlikely to significantly affect the results as the pyramidal cell  
283 population dominates the signal.

284 The reduction in the number of cells showing impaired activity but an increase in activity of  
285 individual neurons was perplexing, but may be explicable based on the complex  
286 pharmacological effects of muscarinic blockade. The reduction in cellular activity would be  
287 predicted from the inhibitory effect of muscarinic receptors on at least two types of potassium  
288 channels, especially the "M current" carried by Kv7 subtype channels inhibited by muscarinic  
289 receptors that are expressed at high density at the axon hillock, a specialised area of neurons  
290 modulating cell firing (Shah et al., 2008). ACh normally inhibits this current and increases  
291 activity, so scopolamine would be expected to reduce overall neural excitability. There are  
292 several other mechanisms by which muscarinic receptors increase neuronal activity (see  
293 Dannenberg et al., 2017), which would again likely produce reduced excitation with inhibition.  
294 On the other hand, Widman and McMahon (2018) have recently demonstrated in rat CA1  
295 neurons *in vitro* reduced inhibitory input onto pyramidal cells and increased synaptically driven

296 excitability measured at the single-cell and population levels which may be the mechanism for  
297 the increased activity seen. Sharp waves and ripples (SWRs) are hippocampal oscillatory  
298 patterns, which are believed to be crucial for memory consolidation, retrieval and planning  
299 (Girardeau et al., 2009; Carr et al., 2011). Although these oscillations are usually observed  
300 during animal's behavioural immobility and slow-wave sleep (Buzsaki et al., 1992), they are  
301 also present during track or maze running period (Buzsaki, 2015; Cowen et al., 2020; see Joo  
302 and Frank 2018 for review). Some *in vivo* studies found that the reinforced hippocampal theta  
303 rhythm was characterized by the increased release of Ach (Parikh et al., 2007; Zhang et al.,  
304 2010), while inhibited cholinergic activity gave rise to SWRs (Buzsaki and Vanderwolf, 1983;  
305 Norimoto et al., 2012), and the suppression of SWRs could be rescued by muscarinic receptor  
306 antagonists (Ma et al., 2020). On one hand, blocking the muscarinic receptors increases the  
307 neural "M current", which increases the firing potential threshold, leading to a reduction on the  
308 quantity of detected neurons. On the other hand, it also increases the probability of the  
309 appearance of SWRs, resulting in an increased average firing frequency.

310 Reduction of neuronal firing has also been seen *in vivo* with an mAChR antagonist (Brazhnik  
311 et al., 2003). If the neuron's firing pattern became less stable, the  $Ca^{2+}$  event rate may increase,  
312 an extreme example was shown in Figure 11. In order to test this hypothesis, we studied the  
313 stability of neural ensemble. First, the spatial information content of the place cells reduced  
314 significantly after injecting scopolamine, which implied the fading location sensitivity of the  
315 neural ensemble, and clear differences could also be identified from the place field map.  
316 Besides, some researchers also found that the best fit line of the spikes recorded had a phase  
317 shift with respect to the corresponding local field potentials after injecting scopolamine in  
318 memory encoding and retrieval process (Douchamps et al., 2013; Newman et al., 2017), and  
319 this implied that the firing pattern of the neural ensemble changed after blocking mAChR, which  
320 consisted with our hypothesis to a certain extent. Interestingly, it seemed that the neural  
321 ensemble's "spontaneous firing" was much stronger in the experiments when the animal run  
322 from left to right, possibly due to the clue painted on two ends (left: green colour clue; right:  
323 red colour clue) of the linear track were different, and the mice were more sensitive to green  
324 colour than red colour as described by Peirson et al. (2018). Finally, we quantified the stability  
325 of the neural system by calculating PVO between odd and even trials data within one session,  
326 the diagonalization feature disappeared after blocking mAChR. Besides, the value of mean PVO  
327 was relatively bigger with larger distance offset after blocking mAChR, this implied that the

328 animal was more likely to confuse the locations that were far away from each other rather than  
329 adjacent locations in linear track.

330 The animal used in the experiments was trained to run back and forth in a linear track for  
331 multiple times and was given a long time period to acclimate the track before recording. A  
332 memory regarding the linear track should be formed and consolidated. This assumption could  
333 be verified from the results of saline group, the spatial information content of place cells and  
334 the mean PVO with respect to distance offset almost did not change too much compared with  
335 baseline. In order to make the most use of the data, we used a leave-one-out Bayesian classifier  
336 to estimate the animal's position in the linear track. After the administration of scopolamine,  
337 the error rate increased dramatically, which consisted with the results of PVO map in some  
338 sense, and this implied that the mAChR antagonist had significant detrimental effects on  
339 memory retrieval. Cacucci et al. (2007) reported that the spatial tuning of place cells improved  
340 over time. Intriguingly, the saline group showed increased decoding accuracy, most likely due  
341 to the enhancement of the place fields with time.

342 The AAV virus we injected into hippocampal CA1 marked both pyramidal neurons and  
343 interneurons. Both pyramidal neurons and interneurons play important roles in animal's spatial  
344 navigation, but with different mechanism of action (Gloveli, 2010), and the current miniscope  
345 recording system cannot distinguish them. As increased neural firing rate was observed after  
346 the administration of scopolamine, another possible reason may duo to the different effects of  
347 scopolamine on the firing pattern of pyramidal neurons and interneurons. The traditional  
348 method to distinguish the pyramidal neurons and interneurons by using intracranial electrodes  
349 depended on neuron's mean firing rate (Fox and Ranck 1981; Ranck 1973), spike duration  
350 (Skaggs et al. 1996), and the autocorrelation function (Csicsvari et al. 1999). Sometimes, this  
351 statistics-based method cannot guarantee considerable accuracy, and simultaneous two-colour  
352 imaging (Aharoni et al., 2013) may be a possible better way to overcome this problem with the  
353 help of two carefully selected AAV virus combined with different fluorophores to mark the  
354 neurons separately. Both the new recording system and experiment design deserve further  
355 study.

356 In summary, our results suggest a close relationship between the blockade of mAChR and  
357 deficits in memory retrieval. The deteriorate memory decoding and increased  $Ca^{2+}$  event rate  
358 may derive from the decreased stability of the neural ensemble.

359

360 **Figure 1**

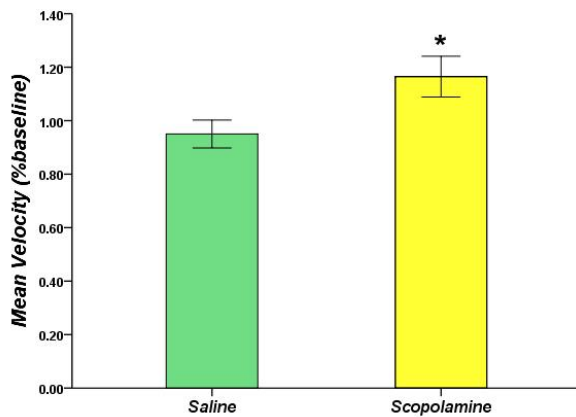

361

362 **Figure 1.** The percentage variation of the animal's running speed after injecting saline or  
363 scopolamine (1 mg/kg) with respect to the baseline self-control. \* P<0.05 represents the  
364 significant difference between scopolamine and saline groups.

365

366 **Figure 2**

367 **A**

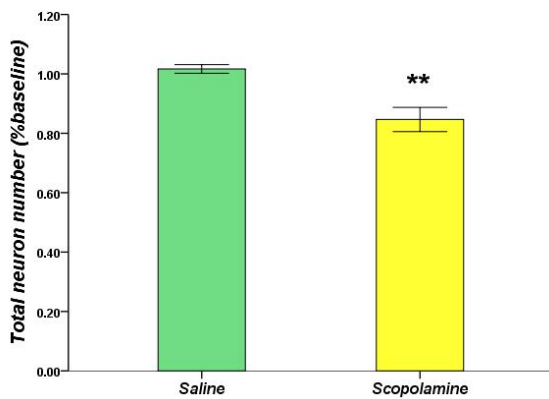

**B**

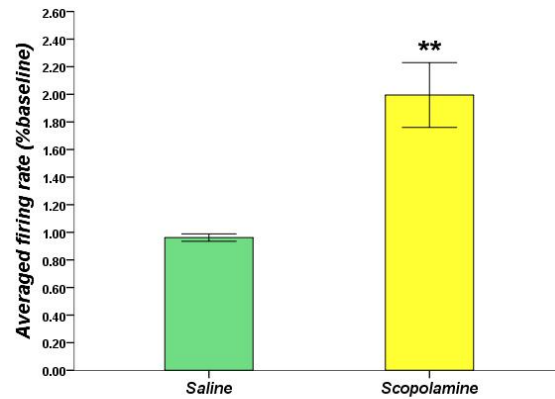

368

369 **Figure 2.** (A)The animal's total neuron number within the field of view significantly reduced  
370 after injecting scopolamine (1 mg/kg) with respect to saline. (B)The scopolamine (1 mg/kg)  
371 dramatically enhanced neurons' averaged  $Ca^{2+}$  event rate compared with saline. \*\* P<0.01  
372 represents the significant difference between scopolamine and saline groups.

373

374

375 **Figure 3**

376 **A**

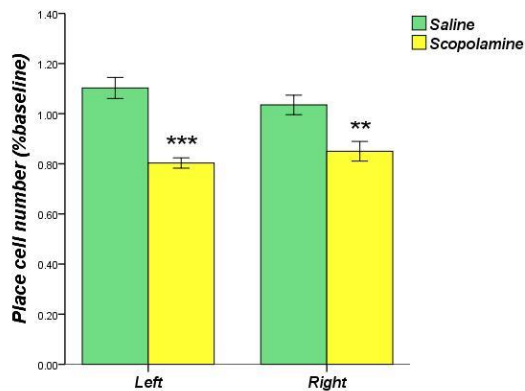

**B**

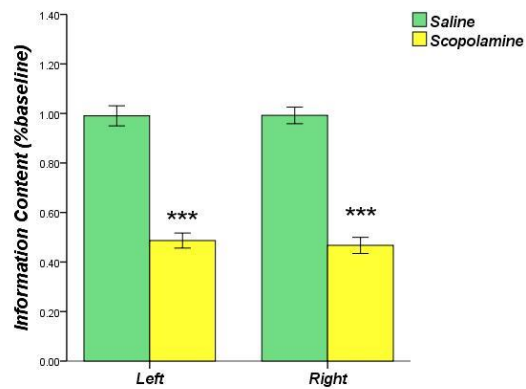

377

378 **Figure 3.** (A) The place cell numbers measured declined significantly after the administration  
379 of scopolamine (1 mg/kg) compared with saline during both left-towards and right-towards  
380 running directions. (B) The scopolamine (1 mg/kg) significantly depressed the neurons' spatial  
381 information content with respect to saline. \*\*  $P < 0.01$ , \*\*\*  $P < 0.001$  represents the significant  
382 difference between scopolamine and saline groups.

383 **Figure 4**

384 **A**

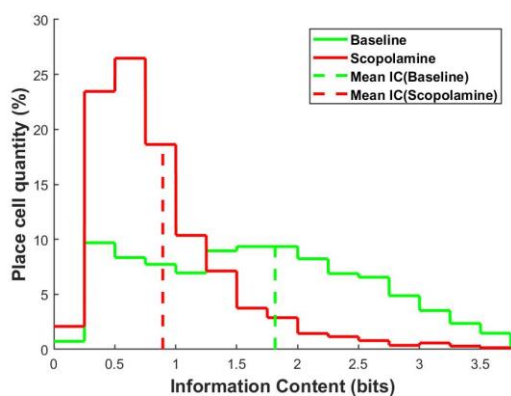

**B**

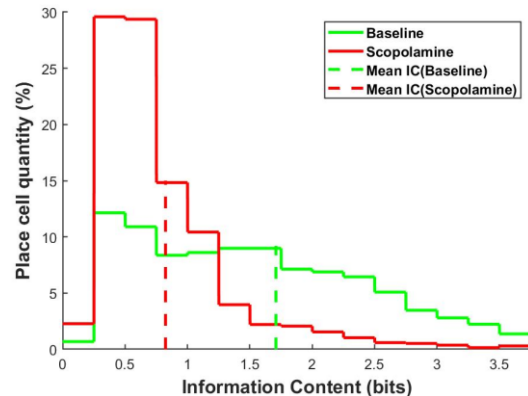

385

386 **Figure 4.** The averaged information content measured across five animals before (green solid  
387 line) and after (red solid line) scopolamine (1 mg/kg) injection in left-towards running direction  
388 (A) and right-towards running direction (B). The dashed vertical line represented the averaged  
389 mean.

390

391 **Figure 5**

392 **A**

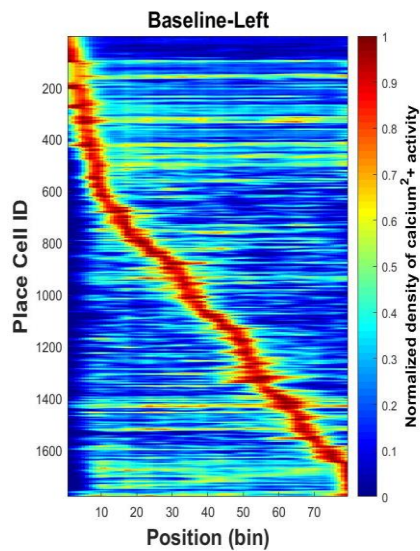

**B**

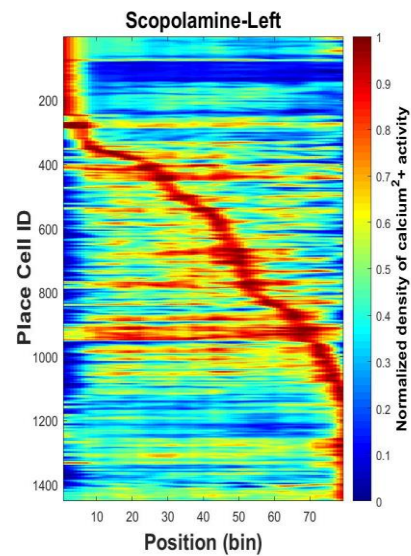

393

394 **C**

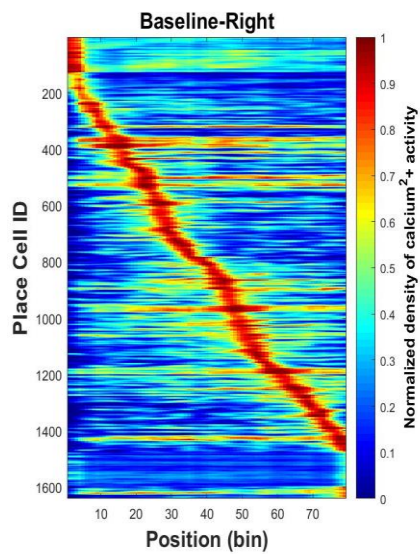

**D**

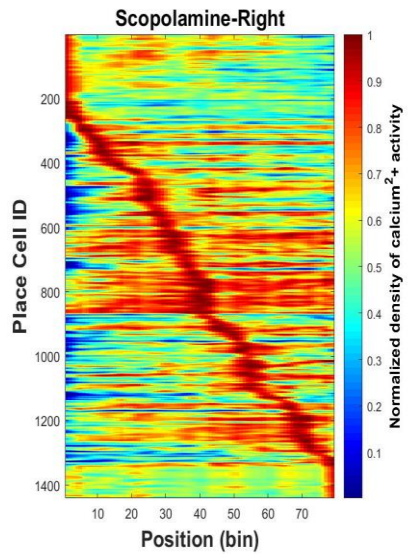

395

396 **Figure 5.** Normalized place field map (See method) when the animal was running on the linear  
397 track from right to left before and after scopolamine (1 mg/kg) injection (A, B) and from left  
398 to right (C, D). The bin size was 2cm. The location sensitivity of the place cells decreased after  
399 drug administration.

400

401

402 **Figure 6**

403 **A**

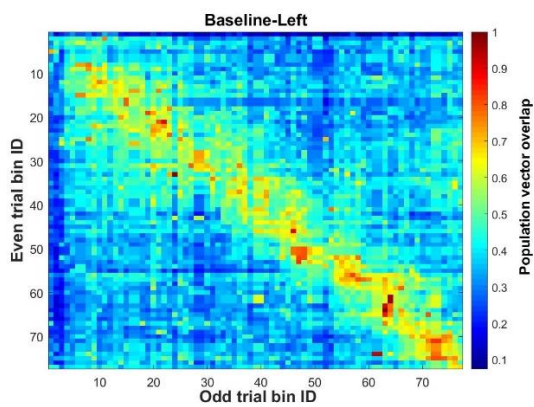

**B**

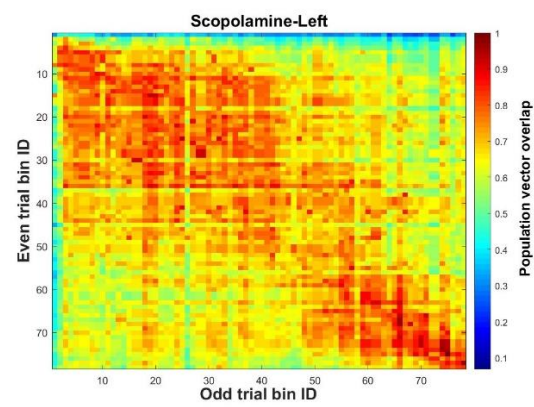

404

405 **C**

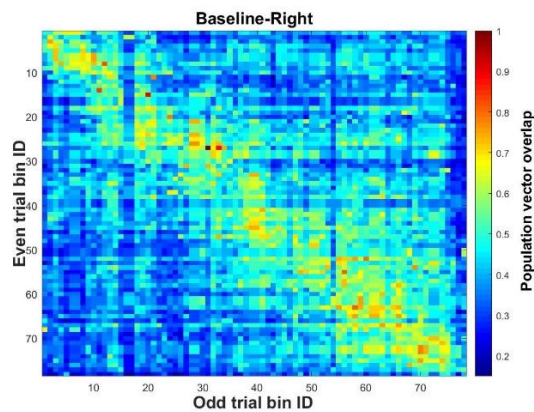

**D**

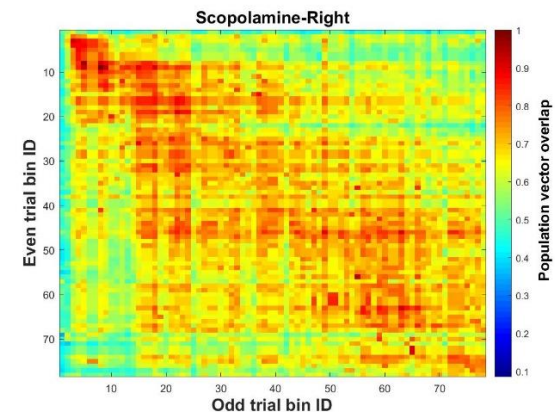

406

407 **Figure 6.** Normalized population vector overlap (PVO) of the place cells between odd trials  
408 and even trials before and after the scopolamine (1 mg/kg) administration in left-towards (A,  
409 B) and right-towards (C, D) running directions. The PVO increased dramatically after drug  
410 injection.

411

412

413

414

415

416



417 **Figure 7**

418 **A**

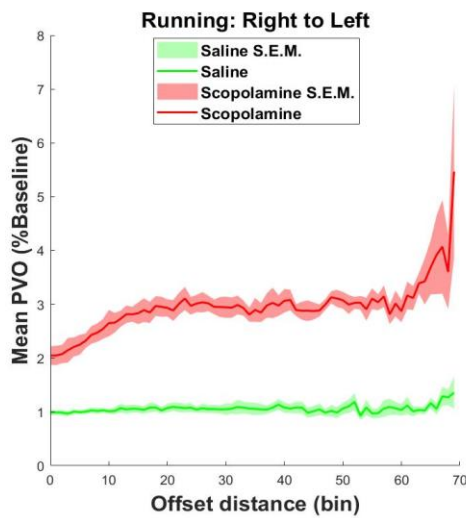

418 **B**

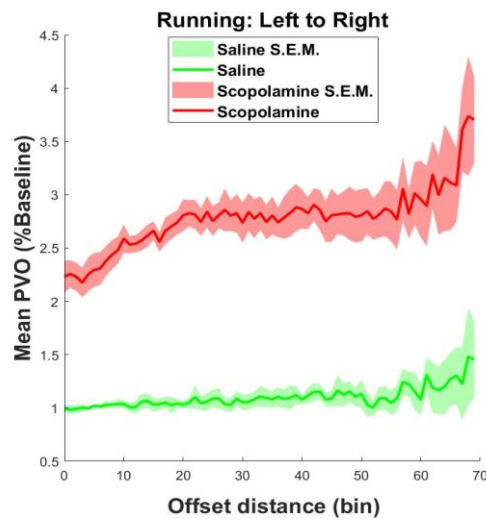

419

420 **Figure 7.** The mean odd-even trails PVO averaged over 5 animals with respect to the distance  
421 offset when the animal run from right to left (A) and from left to right (B). After the  
422 administration of scopolamine (1 mg/kg), the mean PVO elevated significantly across different  
423 distance offset in both running directions (\*\* $p < 0.01$ ). The shadowed area showed the standard  
424 error mean.

425

426

427 **Figure 8**

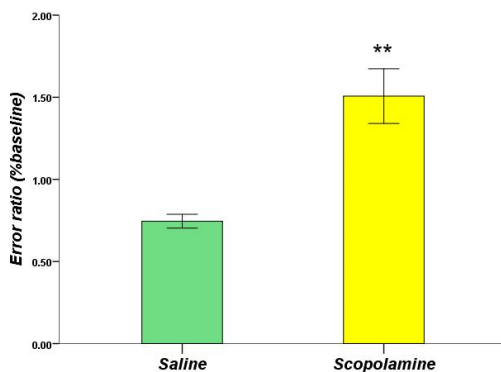

428

429 **Figure 8.** The percentage variation of the error ratio after injecting saline or scopolamine (1  
430 mg/kg) with respect to the baseline self-control. \*\*  $P < 0.01$  represents the significant difference  
431 between scopolamine and saline groups.

432 **Figure 9**

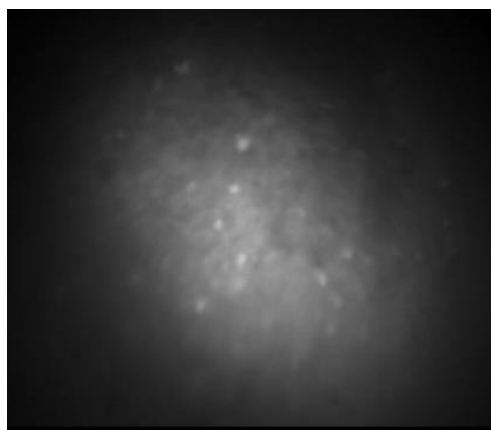

433

434 **Figure 9.** An example of the raw fluorescent data

435

436 **Figure 10**

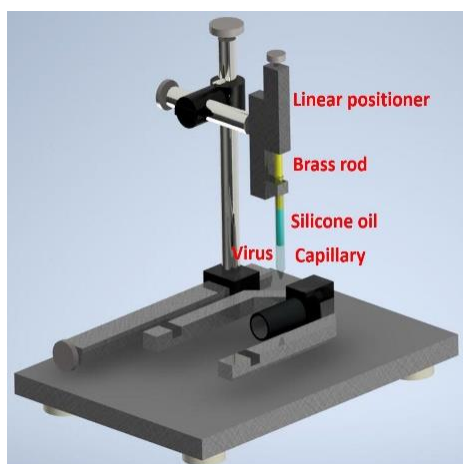

437

438 **Figure 10.** Custom made virus infusion instrument

439

440

441

442

443

444

445

446 **Figure 11**

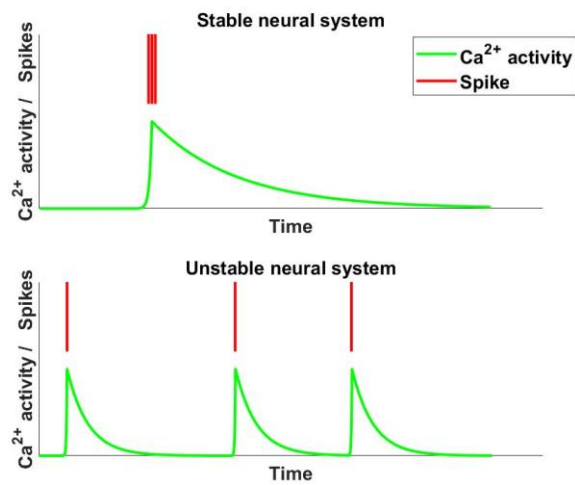

447

448 **Figure 11.** An extreme example showing that the  $Ca^{2+}$  event rate could increase with different  
449 neuron's firing pattern. The calcium activity maybe submerged by continuous spike activity.

450

451 **Figure 12**

452 **A**

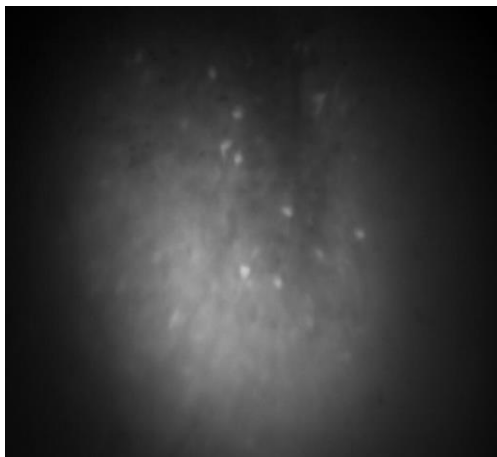

**B**

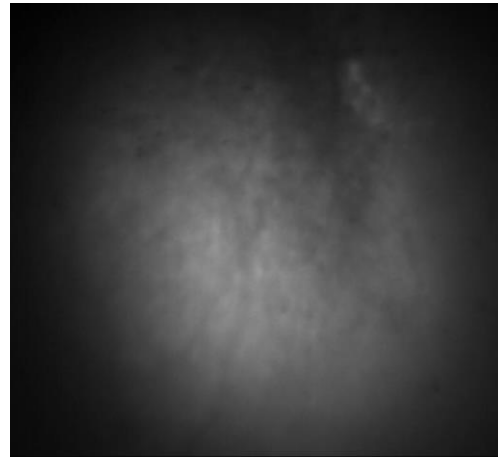

453

454 **Figure 12.** An example showing the  $Ca^{2+}$  activity before (A) and after (B) the administration  
455 of scopolamine. The fluorescent intensity decreased dramatically after injecting scopolamine.

456

457

458

459 **Reference**

- 460 Aharoni, D.B. and Hoogland, T., 2019. Circuit investigations with open-source miniaturized microscopes:  
461 past, present and future. *Frontiers in cellular neuroscience*, 13, p.141.
- 462 Aharoni, D., Khakh, B.S., Silva, A.J. and Golshani, P., 2019. All the light that we can see: a new era in  
463 miniaturized microscopy. *Nature methods*, 16(1), p.11.
- 464 Brazhnik, E.S., Muller, R.U. and Fox, S.E., 2003. Muscarinic blockade slows and degrades the location-specific  
465 firing of hippocampal pyramidal cells. *Journal of Neuroscience*, 23(2), pp.611-621.
- 466 Bushnell, P.J., 1987. Effects of scopolamine on locomotor activity and metabolic rate in mice. *Pharmacology*  
467 *Biochemistry and Behavior*, 26(1), pp.195-198.
- 468 Buzsáki, G., 2015. Hippocampal sharp wave-ripple: A cognitive biomarker for episodic memory and  
469 planning. *Hippocampus*, 25(10), pp.1073-1188.
- 470 Buzsáki, G., Chen, L.S. and Gage, F.H., 1990. Chapter spatial organization of physiological activity in the  
471 hippocampal region: relevance to memory formation. In *Progress in brain research* (Vol. 83, pp. 257-268).  
472 Elsevier.
- 473 Buzsáki, G., Horvath, Z., Urioste, R., Hetke, J. and Wise, K., 1992. High-frequency network oscillation in the  
474 hippocampus. *Science*, 256(5059), pp.1025-1027.
- 475 Buzsáki, G. and Vanderwolf, C.H., 1983. Cellular bases of hippocampal EEG in the behaving rat. *Brain Research*  
476 *Reviews*, 6(2), pp.139-171.
- 477 Cacucci, F., Wills, T.J., Lever, C., Giese, K.P. and O'Keefe, J., 2007. Experience-dependent increase in CA1 place  
478 cell spatial information, but not spatial reproducibility, is dependent on the autophosphorylation of the  $\alpha$ -isoform  
479 of the calcium/calmodulin-dependent protein kinase II. *Journal of Neuroscience*, 27(29), pp.7854-7859.
- 480 Carr, M.F., Jadhav, S.P. and Frank, L.M., 2011. Hippocampal replay in the awake state: a potential substrate for  
481 memory consolidation and retrieval. *Nature neuroscience*, 14(2), p.147.
- 482 Cole, A.E. and Nicoll, R.A., 1984. The pharmacology of cholinergic excitatory responses in hippocampal  
483 pyramidal cells. *Brain research*, 305(2), pp.283-290.
- 484 Cowen, S.L., Gray, D.T., Wiegand, J.P.L., Schimanski, L.A. and Barnes, C.A., 2020. Age-associated changes in  
485 waking hippocampal sharp-wave ripples. *Hippocampus*, 30(1), pp.28-38.
- 486 Csicsvari, J., Hirase, H., Czurkó, A., Mamiya, A. and Buzsáki, G., 1999. Oscillatory coupling of hippocampal  
487 pyramidal cells and interneurons in the behaving rat. *Journal of Neuroscience*, 19(1), pp.274-287.
- 488 Dannenberg, H., Young, K., and Hasselmo, M. (2017). Modulation of Hippocampal Circuits by Muscarinic and  
489 Nicotinic Receptors. *Frontiers in Neural Circuits* 11.
- 490 Deiana, S., Platt, B. and Riedel, G., 2011. The cholinergic system and spatial learning. *Behavioural brain*  
491 *research*, 221(2), pp.389-411.

- 492 Douchamps, V., Jeewajee, A., Blundell, P., Burgess, N. and Lever, C., 2013. Evidence for encoding versus  
493 retrieval scheduling in the hippocampus by theta phase and acetylcholine. *Journal of Neuroscience*, 33(20),  
494 pp.8689-8704.
- 495 Dragoi, G. and Buzsáki, G., 2006. Temporal encoding of place sequences by hippocampal cell  
496 assemblies. *Neuron*, 50(1), pp.145-157.
- 497 Falsafi, S.K., Deli, A., Höger, H., Pollak, A. and Lubec, G., 2012. Scopolamine administration modulates  
498 muscarinic, nicotinic and NMDA receptor systems. *PLoS one*, 7(2), p.e32082.
- 499 Fox, S.E. and Ranck, J.B., 1981. Electrophysiological characteristics of hippocampal complex-spike cells and  
500 theta cells. *Experimental Brain Research*, 41(3-4), pp.399-410.
- 501 Friedrich, J., Zhou, P. and Paninski, L., 2017. Fast online deconvolution of calcium imaging data. *PLoS*  
502 *computational biology*, 13(3), p.e1005423.
- 503 Geisler, C., Robbe, D., Zugaro, M., Sirota, A. and Buzsáki, G., 2007. Hippocampal place cell assemblies are  
504 speed-controlled oscillators. *Proceedings of the National Academy of Sciences*, 104(19), pp.8149-8154.
- 505 Ghosh, K.K., Burns, L.D., Cocker, E.D., Nimmerjahn, A., Ziv, Y., El Gamal, A. and Schnitzer, M.J., 2011.  
506 Miniaturized integration of a fluorescence microscope. *Nature methods*, 8(10), p.871.
- 507 Girardeau, G., Benchenane, K., Wiener, S.I., Buzsáki, G. and Zugaro, M.B., 2009. Selective suppression of  
508 hippocampal ripples impairs spatial memory. *Nature neuroscience*, 12(10), p.1222.
- 509 Gloveli, T., 2010. Hippocampal spatial navigation: interneurons take responsibility. *The Journal of*  
510 *physiology*, 588(Pt 23), p.4609.
- 511 Hangya, B., Li, Y., Muller, R.U. and Czurkó, A., 2010. Complementary spatial firing in place cell–interneuron  
512 pairs. *The Journal of physiology*, 588(21), pp.4165-4175.
- 513 Huang, Z.B., Wang, H., Rao, X.R., Zhong, G.F., Hu, W.H. and Sheng, G.Q., 2011. Different effects of  
514 scopolamine on the retrieval of spatial memory and fear memory. *Behavioural brain research*, 221(2), pp.604-  
515 609.
- 516 Izquierdo, I. and Medina, J.H., 1997. Memory formation: the sequence of biochemical events in the hippocampus  
517 and its connection to activity in other brain structures. *Neurobiology of learning and memory*, 68(3), pp.285-316.
- 518 Joo, H.R. and Frank, L.M., 2018. The hippocampal sharp wave–ripple in memory retrieval for immediate use and  
519 consolidation. *Nature Reviews Neuroscience*, 19(12), pp.744-757.
- 520 Kermani, M., Fatahi, Z., Sun, D., Haghparast, A. and French, C., 2018. Operant Protocols for Assessing the Cost-  
521 benefit Analysis During Reinforced Decision Making by Rodents. *JoVE (Journal of Visualized Experiments)*,  
522 (139), p.e57907.
- 523 Klinkenberg, I. and Blokland, A., 2010. The validity of scopolamine as a pharmacological model for cognitive  
524 impairment: a review of animal behavioral studies. *Neuroscience & Biobehavioral Reviews*, 34(8), pp.1307-1350.

- 525 Ma, X., Zhang, Y., Wang, L., Li, N., Barkai, E., Zhang, X., Lin, L. and Xu, J., 2020. The Firing of Theta State-  
526 Related Septal Cholinergic Neurons Disrupt Hippocampal Ripple Oscillations via Muscarinic Receptors. *Journal*  
527 *of Neuroscience*, 40(18), pp.3591-3603.
- 528 Markus, E.J., Barnes, C.A., McNaughton, B.L., Gladden, V.L. and Skaggs, W.E., 1994. Spatial information  
529 content and reliability of hippocampal CA1 neurons: effects of visual input. *Hippocampus*, 4(4), pp.410-421.
- 530 Mishima, K., Iwasaki, K., Tsukikawa, H., Matsumoto, Y., Egashira, N., Abe, K., Egawa, T. and Fujiwara, M.,  
531 2000. The scopolamine-induced impairment of spatial cognition parallels the acetylcholine release in the ventral  
532 hippocampus in rats. *The Japanese Journal of Pharmacology*, 84(2), pp.163-173.
- 533 More, S.V., Kumar, H., Cho, D.Y., Yun, Y.S. and Choi, D.K., 2016. Toxin-induced experimental models of  
534 learning and memory impairment. *International journal of molecular sciences*, 17(9), p.1447.
- 535 Moser, E.I., Kropff, E. and Moser, M.B., 2008. Place cells, grid cells, and the brain's spatial representation  
536 system. *Annu. Rev. Neurosci.*, 31, pp.69-89.
- 537 Muir, G.M. and Taube, J.S., 2002. The neural correlates of navigation: do head direction and place cells guide  
538 spatial behavior?. *Behavioral and Cognitive Neuroscience Reviews*, 1(4), pp.297-317.
- 539 Newman, E.L., Venditto, S.J.C., Climer, J.R., Petter, E.A., Gillet, S.N. and Levy, S., 2017. Precise spike timing  
540 dynamics of hippocampal place cell activity sensitive to cholinergic disruption. *Hippocampus*, 27(10), pp.1069-  
541 1082.
- 542 Norimoto, H., Mizunuma, M., Ishikawa, D., Matsuki, N. and Ikegaya, Y., 2012. Muscarinic receptor activation  
543 disrupts hippocampal sharp wave-ripples. *Brain research*, 1461, pp.1-9.
- 544 O'Keefe, J. and Dostrovsky, J., 1971. The hippocampus as a spatial map: preliminary evidence from unit activity  
545 in the freely-moving rat. *Brain research*.
- 546 Parikh, V., Kozak, R., Martinez, V. and Sarter, M., 2007. Prefrontal acetylcholine release controls cue detection  
547 on multiple timescales. *Neuron*, 56(1), pp.141-154.
- 548 Peirson, S.N., Brown, L.A., Potheary, C.A., Benson, L.A. and Fisk, A.S., 2018. Light and the laboratory  
549 mouse. *Journal of neuroscience methods*, 300, pp.26-36.
- 550 Pennington, Z.T., Dong, Z., Feng, Y., Vetere, L.M., Page-Harley, L., Shuman, T. and Cai, D.J., 2019. ezTrack:  
551 An open-source video analysis pipeline for the investigation of animal behavior. *Scientific Reports*, 9(1), pp.1-11.
- 552 Pfeiffer, B.E. and Foster, D.J., 2013. Hippocampal place-cell sequences depict future paths to remembered  
553 goals. *Nature*, 497(7447), p.74.
- 554 Pnevmatikakis, E.A. and Giovannucci, A., 2017. NoRMCorre: An online algorithm for piecewise rigid motion  
555 correction of calcium imaging data. *Journal of neuroscience methods*, 291, pp.83-94.
- 556 Ranck Jr, J.B., 1973. Studies on single neurons in dorsal hippocampal formation and septum in unrestrained rats:  
557 Part I. Behavioral correlates and firing repertoires. *Experimental neurology*, 41(2), pp.462-531.

- 558 Ravassard, P., Kees, A., Willers, B., Ho, D., Aharoni, D., Cushman, J., Aghajan, Z.M. and Mehta, M.R., 2013.  
559 Multisensory control of hippocampal spatiotemporal selectivity. *Science*, 340(6138), pp.1342-1346.
- 560 Riekkinen, M. and Riekkinen Jr, P., 1997. Dorsal hippocampal muscarinic acetylcholine and NMDA receptors  
561 disrupt water maze navigation. *Neuroreport*, 8(3), pp.645-648.
- 562 Rubin, A., Geva, N., Sheintuch, L. and Ziv, Y., 2015. Hippocampal ensemble dynamics timestamp events in long-  
563 term memory. *Elife*, 4, p.e12247.
- 564 Shah, M.M., Migliore, M., Valencia, I., Cooper, E.C., and Brown, D.A. (2008). Functional significance of axonal  
565 Kv7 channels in hippocampal pyramidal neurons. *Proceedings of the National Academy of Sciences* 105, 7869–  
566 7874.
- 567 Skaggs, W.E., McNaughton, B.L., Wilson, M.A. and Barnes, C.A., 1996. Theta phase precession in  
568 hippocampal neuronal populations and the compression of temporal sequences. *Hippocampus*, 6(2),  
569 pp.149-172.
- 570 Svoboda, J., Popelikova, A. and Stuchlik, A., 2017. Drugs interfering with muscarinic acetylcholine receptors and  
571 their effects on place navigation. *Frontiers in psychiatry*, 8, p.215.
- 572 Toide, K., 1989. Effects of scopolamine on extracellular acetylcholine and choline levels and on spontaneous  
573 motor activity in freely moving rats measured by brain dialysis. *Pharmacology Biochemistry and Behavior*, 33(1),  
574 pp.109-113.
- 575 UCLA Miniscope. 2017. [ONLINE] Available at: [http://miniscope.org/index.php/Main\\_Page](http://miniscope.org/index.php/Main_Page). [Accessed 1  
576 August 2018].
- 577 WATANABE, H. and SHIMIZU, H., 1989. Effect of anticholinergic drugs on striatal acetylcholine release and  
578 motor activity in freely moving rats studied by brain microdialysis. *The Japanese Journal of Pharmacology*, 51(1),  
579 pp.75-82.
- 580 Widman, A.J. and McMahon, L.L., 2018. Disinhibition of CA1 pyramidal cells by low-dose ketamine and other  
581 antagonists with rapid antidepressant efficacy. *Proceedings of the National Academy of Sciences*, 115(13),  
582 pp.E3007-E3016.
- 583 Wikenheiser, A.M. and Redish, A.D., 2015. Decoding the cognitive map: ensemble hippocampal sequences and  
584 decision making. *Current opinion in neurobiology*, 32, pp.8-15.
- 585 Wiltgen, B.J., Zhou, M., Cai, Y., Balaji, J., Karlsson, M.G., Parivash, S.N., Li, W. and Silva, A.J., 2010. The  
586 hippocampus plays a selective role in the retrieval of detailed contextual memories. *Current Biology*, 20(15),  
587 pp.1336-1344.
- 588 Zhang, H., Lin, S.C. and Nicolelis, M.A., 2010. Spatiotemporal coupling between hippocampal acetylcholine  
589 release and theta oscillations in vivo. *Journal of Neuroscience*, 30(40), pp.13431-13440.
- 590 Zhang, K., Ginzburg, I., McNaughton, B.L. and Sejnowski, T.J., 1998. Interpreting neuronal population activity  
591 by reconstruction: unified framework with application to hippocampal place cells. *Journal of*  
592 *neurophysiology*, 79(2), pp.1017-1044.

593 Zhou, P., Resendez, S.L., Rodriguez-Romaguera, J., Jimenez, J.C., Neufeld, S.Q., Giovannucci, A., Friedrich, J.,  
594 Pnevmatikakis, E.A., Stuber, G.D., Hen, R. and Kheirbek, M.A., 2018. Efficient and accurate extraction of in vivo  
595 calcium signals from microendoscopic video data. *Elife*, 7, p.e28728.

596
